# 1 Can foot placement during gait be trained?

## 2 Adaptations in stability control when ankle moments are constrained

3  
4 L.A. Hoogstad<sup>1\*</sup>, A.M. van Leeuwen<sup>1,2\*</sup>, J.H. van Dieën<sup>1,2</sup>, S.M. Bruijn<sup>1,2</sup>

5 <sup>1</sup>Department of Human Movement Sciences, Faculty of Behavioural and Movement Sciences,  
6 Vrije Universiteit Amsterdam, Amsterdam Movement Sciences, Amsterdam, The Netherlands

7 <sup>2</sup>Institute of Brain and Behavior Amsterdam

8 Email: [a.m.van.leeuwen@vu.nl](mailto:a.m.van.leeuwen@vu.nl)

9 \*Shared first authorship

### 12 Abstract

13  
14 Accurate coordination of mediolateral foot placement, relative to the center of mass kinematic state, is  
15 one of the mechanisms which ensures mediolateral stability during human walking. Previously, we  
16 found that shoes constraining ankle moments decreased foot placement accuracy, presumably by  
17 impairing control over movement of the swing leg. As such, ankle moment constraints can be seen as a  
18 perturbation of foot placement. Direct mechanical perturbations of the swing leg trajectory can improve  
19 foot placement accuracy as an after-effect. Here, we asked whether constrained ankle moments could  
20 have a similar effect. If confirmed, this would offer a simple training tool for individuals with impaired  
21 foot placement control. Participants (n=19) walked in three conditions; normal (baseline, 10 minutes),  
22 while wearing shoes constraining ankle moments (training, 15 minutes), and normal again (after-effects,  
23 10 minutes). Foot placement accuracy was calculated as the percentage of variance in foot placement  
24 that could be predicted based on the center of mass kinematic state in the preceding swing phase. When  
25 walking with constrained ankle moments, foot placement accuracy decreased initially compared to  
26 baseline, but it gradually improved over time. In the after-effect condition, foot placement accuracy was  
27 higher than during baseline, but this difference was not significant. When walking with constrained  
28 ankle moments, we observed increased step width, decreased stride time and reduced local dynamic  
29 stability. In conclusion, constraining ankle moment control deteriorates foot placement accuracy. A non-  
30 significant trend towards improved foot placement accuracy after prolonged exposure to constrained  
31 ankle moments, allows for speculation on a training potential.

## 36 1. Introduction

37

38 Stable gait is crucial for activities of daily living. With aging, changes occur that affect the ability to  
39 maintain stability (Rubenstein, 2006; Vandervoort, 2002) and this constitutes a public health concern.  
40 Falls are common in older adults and can have severe impacts on their functionality and well-being  
41 (Rubenstein and Josephson, 2006). Furthermore, injuries related to falls lead to accumulating healthcare  
42 costs (Florence et al., 2018; Polinder et al., 2016).

43 Gait stability requires the coordination of the center of mass relative to the base of support  
44 (Bruijn and van Dieën, 2018). Different strategies can be used to establish appropriate coordination  
45 between the center of mass and the base of support (Reimann et al., 2018). Accurate foot placement  
46 relative to the body's kinematic state, seems to be the dominant strategy (Bruijn and van Dieën, 2018).  
47 Foot placement defines the borders of the base of support, and through foot placement the base of  
48 support can be enlarged or displaced to accommodate the ongoing movement of the center of mass (Hof,  
49 2007; Reimann et al., 2018).

50 Previous work showed that foot placement can be predicted by the full body center of mass  
51 kinematic state during the preceding swing phase (Hurt et al., 2010; Mahaki et al., 2019; van Leeuwen  
52 et al., 2020; Wang and Srinivasan, 2014). The quality of foot placement control can thus be quantified  
53 as the predictability of foot placement based on center of mass kinematic state or proxies thereof.

54 This quality of foot placement control appears to be important to maintain stability. Following  
55 a stroke, individuals demonstrate less accurate foot placement control and less stable gait (Dean and  
56 Kautz, 2015). Similarly, older adults show less accurate foot placement than young adults (Arvin et al.,  
57 2018; Hurt et al., 2010), which may contribute to their elevated fall risk. Therefore, training  
58 interventions targeting foot placement control may help to improve gait stability. Recent research  
59 showed that in young adults, mechanical perturbations of foot placement caused improved foot  
60 placement accuracy as an after-effect (Heitkamp et al., 2019; Reimold et al., 2019).

61 In previous work, we found that walking with constrained ankle moments, wearing a customized  
62 shoe (LesSchuh), decreased foot placement accuracy (van Leeuwen et al., 2020). The LesSchuh is a  
63 shoe on which it is almost impossible to use mediolateral ankle moment control, due to a narrow ridge  
64 attached to the shoe's sole. The decrease in foot placement accuracy with constrained ankle moments  
65 may be caused by an inability to use stance leg ankle moments to control the subsequent foot placement.  
66 During targeted stepping, stance leg ankle moments contribute to accurate foot placement (Zhang et al.,  
67 2020), and also during normal steady-state walking a relationship exists between ankle moment control  
68 and subsequent foot placement (Fettrow et al., 2019). Constrained stance leg ankle moments can thus  
69 be seen as perturbations of foot placement of the contralateral leg. Considering the evidence for after-  
70 effects of direct mechanical perturbations of the swing leg to alter foot placement (Reimold et al., 2019),  
71 prolonged exposure to ankle moment constraints may lead to improved foot placement accuracy in  
72 normal walking.

73 The purpose of the present study was to investigate whether foot placement becomes more  
74 accurate during and after walking with ankle moment constraints. To this end, participants walked for  
75 one training session on the LesSchuh.

76 We hypothesized that the ankle moment constraint imposed by the LesSchuh would cause an  
77 immediate negative effect on foot placement accuracy (H1), followed by an increase in foot placement  
78 accuracy throughout the training condition (H2). Furthermore, we hypothesized a positive after-effect  
79 when participants return to walking on their normal shoes (H3). Finally, we hypothesized that with time  
80 the after-effect would decrease (H4). In addition to changes in foot placement accuracy, we explored  
81 modulations in step width and stride frequency, as compensatory stabilizing mechanisms (van Leeuwen  
82 et al., 2020). In addition, to assess whether gait changes due to LesSchuh training affected gait stability,  
83 we calculated local divergence exponents (Bruijn et al., 2013).

84

85

86

## 87 2. Methods

88

### 89 2.1. Participants

90 Participants were included if aged between 18 and 65 years. Participants with a self-reported history of  
91 neurological or other disorders that could affect the ability to walk independently were excluded. After  
92 explaining the experiment, participants signed written informed consent. The experimental design and  
93 procedures were approved by the Ethical committee (VCWE-2019-108).

94

### 95 2.2. Experimental setup.

96 During the experiment, two different shoes were used for each participant. The first shoe type was a  
97 normal shoe imposing no constraints on gait. The second type was a shoe which constrained ankle  
98 moments; the LesSchuh. A flexible ridge along the sole, as a limited base of support, constrained ankle  
99 moment control in the frontal plane (Figure 1). Due to the flexible ridge, normal roll-off and push-off  
100 can be accomplished, but mediolateral center of pressure shifts are constrained.

101

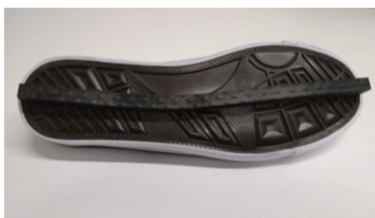

102

103 Figure 1. LesSchuh

104

105 Participants walked on a split-belt treadmill with a safety bar on either side. Full body kinematic data  
106 were recorded with Optotrak (Northern Digital Inc, Waterloo Ont, Canada) at a sampling rate of 50  
107 samples/second. Cluster markers of three LEDs were placed on the feet, shank, thighs, pelvis, trunk,  
108 upper arms, and forearms. 36 anatomical landmarks were digitized by using a six-marker probe.

109

### 110 2.3. Experimental design

111 After placing the markers, the anatomical landmarks were digitized. Subsequently, participants were  
112 asked to walk on a split-belt treadmill in three conditions. During all three conditions the participant  
113 walked at constant ( $1.25 * \sqrt{\text{leg length}}$  m/s) walking speed. In the Baseline condition, the participant  
114 walked for 10 minutes with normal shoes. After this condition, the split-belt was stopped and the  
115 participant was asked to change shoes. In preparation of the 15-minute Training condition, the  
116 anatomical landmarks of both feet were digitized again, while the participant was wearing the LesSchuh.  
117 Then, participants were instructed to walk on the ridge of the shoe while trying to not touch the ground  
118 with the sides of the shoe's sole. In addition, participants were instructed to keep pointing their feet  
119 straight ahead, to avoid a toeing-out strategy (Rebula et al., 2017) as a compensation for the constrained  
120 ankle moments. After the Training condition, the split-belt was stopped and the participant was asked  
121 to change back to normal shoes and the anatomical landmarks were digitized again. In the After-effect  
122 condition, the participant walked for 10 minutes with normal shoes.

123

124 Table 1.

125 Overview of the performed conditions

| Condition    | Time       | Type of shoe |
|--------------|------------|--------------|
| Baseline     | 10 minutes | Normal shoes |
| Training     | 15 minutes | LesSchuh     |
| After-effect | 10 minutes | Normal shoes |

126

### 127 2.4. Data processing

128 Data were processed in Matlab 2021A (The MathWorks Inc., Natick, MA). In case of missing marker  
129 coordinates due to limited visibility, data were interpolated using spline interpolation. Gait events (heel  
130 strike and toe-off) were detected from the "butterfly pattern" of the center of pressure derived from the  
131 force plate data (Roerdink et al., 2008). A step was defined as the period between toe-off and heel strike.

132 Mid-swing was defined at 50 percent of the step. Step width (i.e. mediolateral foot placement) was  
133 calculated based on the position of the digitized heel markers at midstance. For estimation of the center  
134 of mass, the body was segmented in 16 segments: pelvis, abdomen, thorax, head, thighs, feet, upper  
135 arms, forearms and hands. For each segment, an estimation of the mass was made based on the segment  
136 circumference and length by using a regression equation (De Leva, 1996; Zatsiorsky, 1990). The total  
137 body center of mass was derived from a weighted sum of the body segments' center of masses.

138  
139 We considered two epochs of 30 strides (the first 30 and last 30 strides of each condition) for statistical  
140 analysis. To investigate foot placement accuracy, linear regression was used to predict the following  
141 foot placement based on center of mass position and velocity during the preceding swing phase (Mahaki  
142 et al., 2019; van Leeuwen et al., 2020; Wang and Srinivasan, 2014). The ratio between the predicted  
143 foot placement variance and the actual foot placement variance was expressed as the relative explained  
144 variance ( $R^2$ ) and was the main outcome in this study. A high relative explained variance indicates a  
145 stronger relation between center of mass state and the foot placement, i.e. higher foot placement  
146 accuracy. We used regression equation [1] (Bruijn, 2020) in which the mediolateral center of mass  
147 position ( $CoM_{pos}$ ) and velocity ( $CoM_{vel}$ ) at terminal swing predict mediolateral foot placement (FP).  
148  $\beta_{pos}$  and  $\beta_{vel}$  represent the regression coefficients and  $\epsilon$  the residual of the model (i.e. the discrepancy  
149 between predicted and FP). For each epoch of 30 strides, we determined the  $R^2$  of this regression.

$$150 \quad FP = \beta_{pos} \cdot CoM_{pos} + \beta_{vel} \cdot CoM_{vel} + \epsilon, \quad [1]$$

151  
152 As a measure of local dynamic stability, local divergence exponents were determined (Bruijn et al.,  
153 2013; Bruijn, 2021; Mehdizadeh, 2019; Rosenstein et al., 1993) by first constructing a six-dimensional  
154 state space based on time-delayed (25 samples) copies of the 3D center of mass velocity. To this end,  
155 the signal was resampled so that on average each stride was 100 samples in length. Subsequently, we  
156 tracked the divergence for each time point and its five nearest neighbors for 1000 samples (equivalent  
157 to approximately ten strides). A nearest neighbor was defined as a point at the smallest Euclidian  
158 distance, at least half an average stride before or half an average stride after the current time point. We  
159 computed the average logarithmic divergence curve and fitted a line (least squares fit) to this curve over  
160 the first 50 samples (equivalent to approximately half a stride). Finally, we defined the local divergence  
161 exponent as the slope of this line. The higher the local divergence exponent, the less stable the gait  
162 pattern.

163  
164 Step width was defined as the mean distance between mediolateral foot placements. Stride time was  
165 defined as the time between two heel strikes of the same leg.

166  
167 The data and code for the analysis can be found online:  
168 <https://surfdrive.surf.nl/files/index.php/s/ZgLVUg7ftfPkNTO>, and will be uploaded to Zenodo after  
169 the paper has been accepted for publication.

## 170 171 2.5. Statistical analysis

172  
173 To test for changes during the baseline trial, we performed paired t-tests between the start and end values  
174 of the baseline trial for the  $R^2$ , stride time, step width and local divergence exponent.

175  
176 To test each of our hypotheses we performed paired t-tests on the  $R^2$ . For the training and after-effect  
177 conditions, the first and last 30 strides were used, representative of respectively the start and the end of  
178 each trial. To exclude any habituation to treadmill walking from this analysis, only the last 30 strides  
179 were included for the baseline condition. H1 stated that an ankle moment constraint would cause an  
180 immediate negative effect on foot placement accuracy. We thus expected a lower  $R^2$  at the start of the  
181 training as compared to the end of the baseline trial. H2 stated that foot placement accuracy would  
182 increase with longer exposure to ankle moment constraints. We thus expected a higher  $R^2$  at the end of  
183 the training as compared to the start of the training. H3 stated that there would be an after-effect when  
184 walking with normal shoes after the training sessions. We thus expected a higher  $R^2$  at the start of the

185 after-effect condition as compared to the end of the baseline trial. H4 stated that over time the  $R^2$  during  
186 the after-effect condition would decrease towards its baseline level. We thus expected the  $R^2$  at the end  
187 of the after-effect condition to be lower than at the start. Moreover, we explored stride time, step width  
188 and local divergence at the same time points. For all statistical tests,  $p < 0.05$  was treated as significant.  
189

### 190 3. Results

191  
192 Nineteen healthy adults participated in this experiment. Four participants were excluded from further  
193 analysis due to measurement errors that affected the calculations. All data were normally distributed.  
194 On average participants took 529 (SD = 16) steps in the 10-minute baseline condition, 836 (SD= 35)  
195 steps in the 15-minute training condition and 525 (SD =18) steps in the 10-minute after-effect condition.  
196 See figures 2-5 for the observed gait changes during the three conditions.  
197

#### 198 Baseline condition

199  
200 There were significant differences in  $R^2$  (figure 2), stride time (figure 3) and step width (figure 4) when  
201 comparing the end to the start of the baseline trial ( $p < 0.05$ ). We found no significant change in gait  
202 stability (figure 5) over the baseline measurement ( $p > 0.05$ ).  
203

#### 204 Foot placement

205  
206 Walking with LesSchuh led to an immediate decrease in  $R^2$  (figure 2,  $p < 0.05$ ), supporting H1. A  
207 significant increase in  $R^2$  over the training trial (supporting H2,  $p < 0.05$ ) was found. There was no  
208 significant difference between the end of the baseline trial and the start of the after-effect trial ( $p > 0.05$ ),  
209 refuting H3 that there would be an after-effect following the training with LesSchuh. We had  
210 hypothesized that an after-effect, if present, would decrease over time (H3), but there was no significant  
211 difference in  $R^2$  between the start and the end of the after-effect trial ( $p > 0.05$ ).

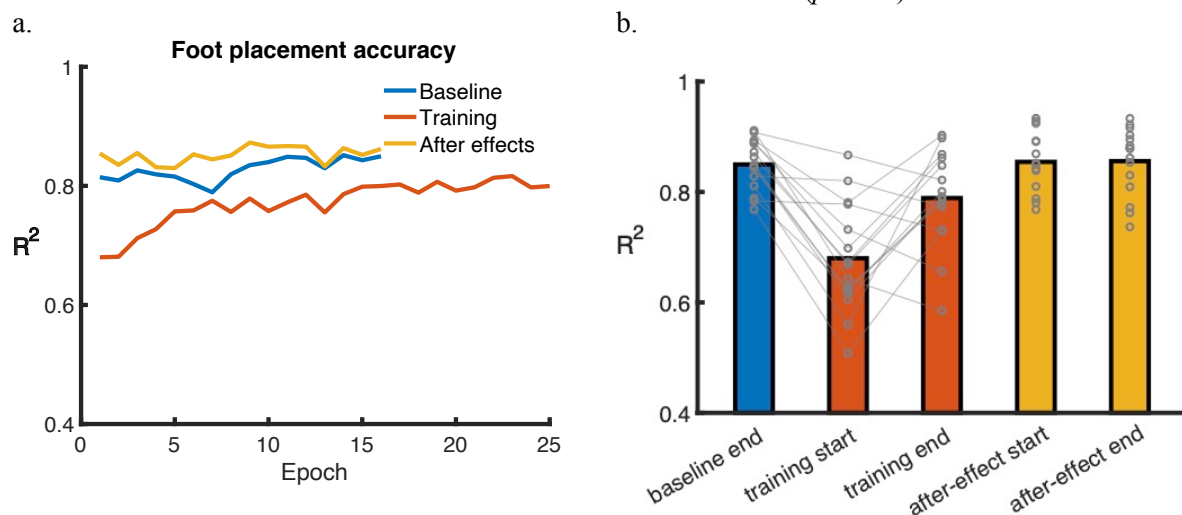

Figure 2. Foot placement accuracy (during the baseline, training and after-effect conditions). (a) Mean relative explained variance ( $R^2$ ) of the foot placement prediction model across 30-strides episodes, (b) Mean  $R^2$  (and individual data points in gray) at the end of the baseline condition, the start and end of the training condition and at the start and end of the after-effect condition. For the significant effects, the individual data points have been connected. For illustrative purposes, in figure 2a, the data is depicted into epochs of 30 steps up to the number of epochs for which all participants had a full final epoch (i.e. including 30 steps).

212

#### 213 Stride time

214  
215 Exploratory analysis showed that stride time was significantly shorter at the start of the training trial as  
216 compared to the end of the baseline trials ( $p < 0.05$ ). During the training, stride time increased again,  
217 resulting in a significant difference in stride time between the end and the start of the training ( $p < 0.05$ ).  
218 At the start of the after-effect trial, stride time was still significantly shorter than at the end of the baseline

219 trial ( $p < 0.05$ ). This effect washed-out, as there was a significant increase in stride time from the start  
220 until the end of the after-effect condition ( $p < 0.05$ ).  
221

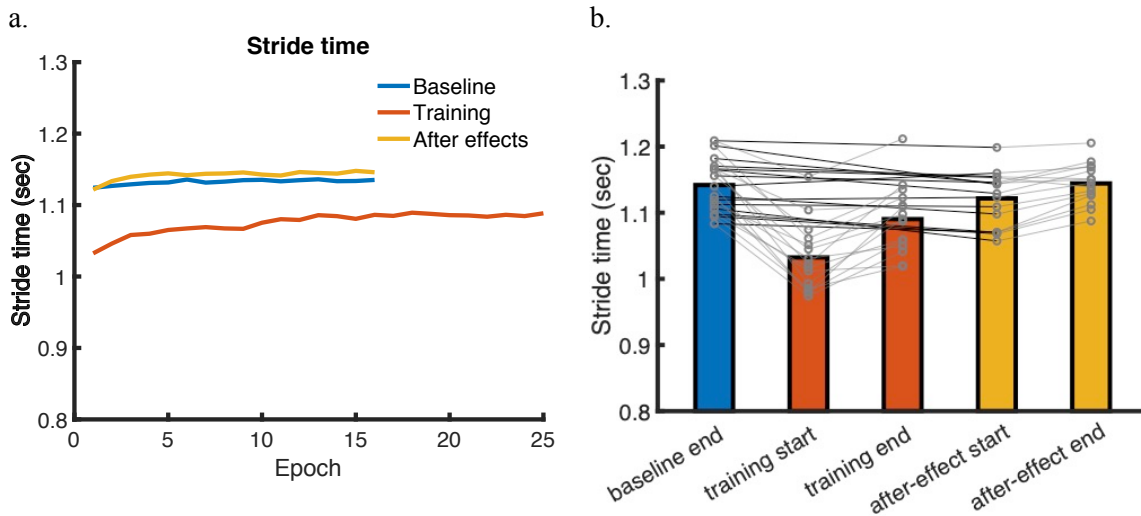

Figure 3. Stride times (during the baseline, training and after-effect conditions). (a) Mean stride time across stride episodes (b) Mean stride (and individual data points in gray) at the end of the baseline condition, the start and end of the training condition and at the start and end of the after-effect condition. For the significant effects, the individual data points have been connected. For illustrative purposes, in figure 3a, the data is depicted into epochs of 30 steps up to the number of epochs for which all participants had a full final epoch (i.e. including 30 steps).

222

## 223 Step width

224

225 Step width increased compared to baseline when walking with LesSchuh at the start of the training  
226 ( $p < 0.05$ ). There was no significant decrease in step width during the training ( $p > 0.05$ ), nor a significant  
227 after-effect ( $p > 0.05$ ). In line with this, there was no significant difference between the start and the end  
228 of the after-effect trial ( $p > 0.05$ ).  
229

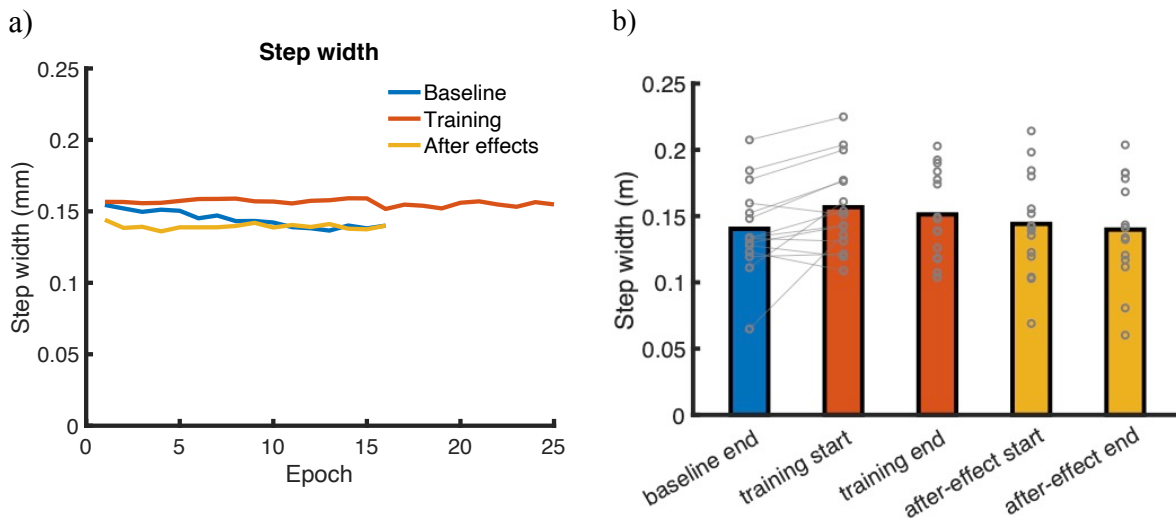

Figure 4. Step width (during the baseline, training and after-effect conditions). (a) Mean step width across stride episodes, (b) Mean step width (and individual data points in gray) at the end of the baseline condition, the start and end of the training condition and at the start and end of the after-effect condition. For the significant effect, the individual data points have been connected. For illustrative purposes, in figure 4a, the data is depicted into epochs of 30 steps up to the number of epochs for which all participants had a full final epoch (i.e. including 30 steps).

230

231

232 Gait stability

233

234 The local divergence exponent (figure 5) significantly increased (i.e. local dynamic stability  
235 decreased) when walking with LesSchuh at the start of the training as compared to the end of the  
236 baseline trial ( $p<0.05$ ). There was no significant change during the training, nor was there an after-  
237 effect ( $p>0.05$ ). In line with this, there was no change in stability between the start and the end of the  
238 after-effect condition ( $p>0.05$ ).  
239

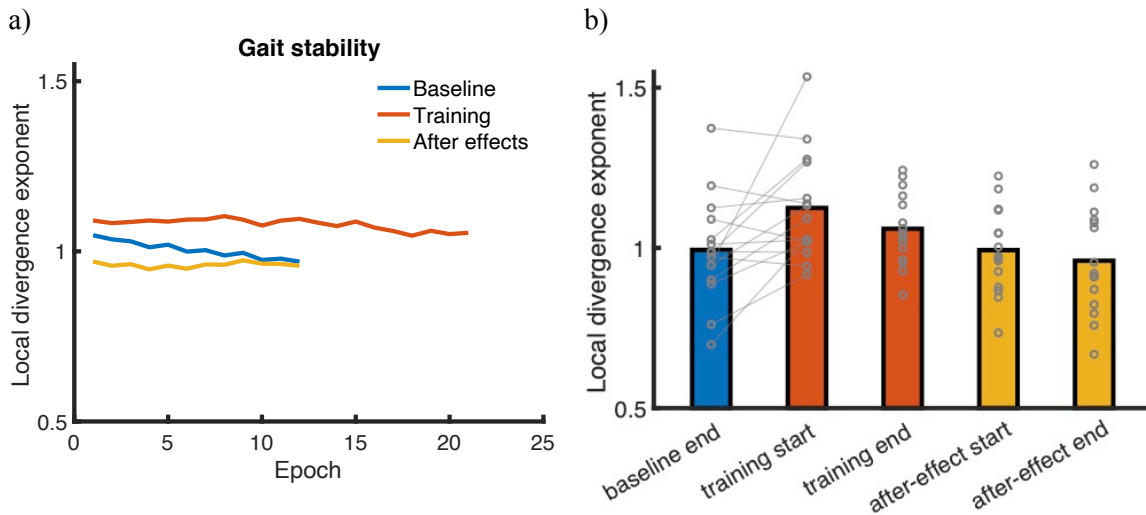

Figure 5. Gait stability (during the baseline, training and after-effect conditions. (a) Mean local divergence exponents across stride episodes, (b) Mean local divergence exponents (and individual data points in gray) at the end of the baseline condition, the start and end of the training condition and at the start and end of the after-effect condition. A lower local divergence exponent represents increased gait stability. For the significant effect, the individual data points have been connected. For illustrative purposes, in figure 5a, the data is depicted into epochs of 30 steps up to the number of epochs for which all participants had a full final epoch (i.e. including 30 steps

240

241



## 242 4. Discussion

243  
244 The main purpose of this study was to investigate whether foot placement becomes more accurate after  
245 walking with shoes constraining ankle moments. We used ankle moment constraints as a foot placement  
246 perturbation to train foot placement accuracy. We verified that foot placement accuracy decreased while  
247 walking with shoes constraining ankle moments. We also observed increasing foot placement accuracy  
248 during longer exposure to the ankle moment constraining shoes. However, despite this adaptation, foot  
249 placement accuracy did not significantly increase as an after-effect upon returning to normal shoes. As  
250 an exploratory analysis, we assessed changes in stride time, step width and local dynamic stability  
251 alongside the effects on foot placement accuracy. We showed that walking with ankle moment  
252 constraints diminishes stability and coincided with compensatory adjustments in step width and stride  
253 time. We speculate that further improvement of foot placement accuracy may be achieved with a longer  
254 training period, and that the non-significant trend towards an after-effect reflects a training potential.  
255 Below we discuss the gait changes per condition.  
256

### 257 Gait changes during the baseline condition

258 During the baseline condition, foot placement accuracy, stride time and step width changed significantly  
259 from the start until the end of the trial. Such changes reflect the need for habituation to treadmill walking.  
260 We did not use a familiarization period prior to the baseline condition. This may limit the interpretation  
261 of our results. However, previous research showed that 6-7 minutes (425 strides) of treadmill walking  
262 is sufficient to achieve stable gait parameters (Meyer et al., 2019). Since participants walked for 10  
263 minutes in the baseline condition, one may reasonably assume the last 30 strides of these trials to provide  
264 a valid reference for further comparisons.  
265

### 266 Gait changes in the training condition

267 In the training condition, participants walked while wearing LesSchuh (Figure 1). As expected from  
268 earlier results (van Leeuwen et al., 2020), foot placement accuracy decreased and step width and stride  
269 frequency increased. Increasing step width and stride frequency appears to be an appropriate strategy to  
270 maintain stability, in spite of reduced foot placement accuracy (Hak et al., 2013; Perry and Srinivasan,  
271 2017). However, here local dynamic stability diminished when ankle moments were constrained, despite  
272 these compensatory mechanisms. Moreover, during unconstrained steady-state walking, step width and  
273 stride frequency seem to be largely determined by an energetic optimum (Delextrat et al., 2011; Donelan  
274 et al., 2001). Thus, increasing step width and frequency likely increases energy cost. Adopting a careful  
275 gait strategy (Wu et al., 2015) could be a temporary compensatory strategy that would disappear when  
276 foot placement accuracy is regained, and a more efficient step width (Donelan et al., 2001; Perry and  
277 Srinivasan, 2017) and stride time can be adopted.  
278

279 Indeed, throughout the training condition, foot placement accuracy gradually improved towards the  
280 baseline level, suggesting a training potential. A higher foot placement accuracy is expected to allow a  
281 narrower step width while remaining equally stable (Perry and Srinivasan, 2017). However, although  
282 stride time increased again throughout the training, step width remained enlarged. Perhaps this is related  
283 to the fact that, at the end of the training condition, foot placement was still less accurate than during  
284 baseline walking. Possibly, foot placement accuracy will continue to improve with longer exposure to  
285 ankle moment constrained walking, before allowing a stable, energetically efficient gait pattern.  
286

### 287 Gait changes in the after-effect condition

288 Similar to the after-effect of direct mechanical foot placement perturbations (Heitkamp et al., 2019), we  
289 expected more accurate foot placement in the after-effect condition. However, although foot placement  
290 accuracy appeared higher throughout the after-effect trial compared to baseline (Figure 2), this  
291 difference was not significant. Therefore, we cannot conclude that walking with LesSchuh leads to an  
292 after-effect. We did not prove that constraining ankle moments can lead to a training effect on foot  
293 placement accuracy during normal steady-state walking. Still, we argue that these results suggest a  
294 training potential of walking with constrained ankle moments.

295

296 For every epoch, average foot placement accuracy was higher in the after-effect condition as compared  
297 to the baseline condition. Taken together with the increase in foot placement accuracy during training,  
298 we speculate that walking on LesSchuh for a longer duration, may induce a larger after-effect,  
299 potentially reaching statistical significance. Alternatively, it may not be the duration but the participant  
300 group which resulted in a statistically undiscernible after-effect. Young adults already have a relatively  
301 high foot placement accuracy (Arvin et al., 2018; Hurt et al., 2010; Wang and Srinivasan, 2014), which  
302 may limit their capacity for improvement. Therefore, a larger training effect could be expected in older  
303 adults (Arvin et al., 2018; Hurt et al., 2010) and patients with an impaired gait pattern (Dean and Kautz,  
304 2015). Lastly, training while imposing additional constraints on other compensatory strategies, i.e. on  
305 average step width and stride frequency, may be more effective in enhancing foot placement accuracy.  
306 In any case, future studies should include a control experiment during which participants walk for the  
307 same duration, but while wearing normal shoes during all trials. This could clarify whether any “after-  
308 effect” truly reflects a training potential, rather than treadmill familiarization.

309

### 310 Conclusion

311 Walking with ankle moment constraints perturbed foot placement control. This was reflected by a  
312 decrease in foot placement accuracy in relation to the center of mass kinematic state. With longer  
313 exposure to the ankle moment constraint, participants adapted, showing increased foot placement  
314 accuracy over time. When walking with normal shoes again, no significant after-effects were found.  
315 Nevertheless, there were indications of a training potential of walking with ankle moment constraints.  
316 It seems the interdependency of ankle moment and foot placement control provides an opportunity for  
317 training interventions.

### 318 Acknowledgements

319 The authors are thankful for the participants and (technical) assistance during the experiment. We are  
320 especially grateful for Leon Schutte, who developed the LesSchuh. The Dutch Research Council  
321 (NWO) (<https://www.nwo.nl/en/>) funded Sjoerd Bruijn (016.Vidi.178.014) and Moira van Leeuwen.

322

## 323 References

- 324
- 325 Arvin, M., Hoozemans, M., Pijnappels, M., Duysens, J., Verschueren, S.M.P., Van Dieen, J.,  
326 2018. Where to step? Contributions of stance leg muscle spindle afference to planning of  
327 mediolateral foot placement for balance control in young and older adults. *Frontiers in*  
328 *physiology* 9, 1134.
- 329 Bruijn, S., Meijer, O., Beek, P., Van Dieën, J., 2013. Assessing the stability of human  
330 locomotion: a review of current measures. *Journal of the Royal Society Interface* 10,  
331 20120999.
- 332 Bruijn, S.M., 2021. SjoerdBruijn/LocalDynamicStability: Latest release, including multiple  
333 nn (1.1). Zenodo. <https://doi.org/10.5281/zenodo.4681213>.
- 334 Bruijn, S.M., van Dieën, J.H., 2018. Control of human gait stability through foot placement.  
335 *Journal of The Royal Society Interface* 15, 20170816.
- 336 Bruijn, S.M.v.L., A.M., 2020. SjoerdBruijn/FootPlacement: Initial Release (Version V1.0).  
337 Zenodo <http://doi.org/10.5281/zenodo.4292212>.
- 338 De Leva, P., 1996. Adjustments to Zatsiorsky-Seluyanov's segment inertia parameters.  
339 *Journal of biomechanics* 29, 1223-1230.
- 340 Dean, J.C., Kautz, S.A., 2015. Foot placement control and gait instability among people with  
341 stroke. *Journal of rehabilitation research and development* 52, 577.
- 342 Delextrat, A., Matthew, D., Cohen, D.D., Brisswalter, J., 2011. Effect of stride frequency on  
343 the energy cost of walking in obese teenagers. *Human movement science* 30, 115-124.
- 344 Donelan, J.M., Kram, R., Arthur D, K., 2001. Mechanical and metabolic determinants of the  
345 preferred step width in human walking. *Proceedings of the Royal Society of London. Series*  
346 *B: Biological Sciences* 268, 1985-1992.
- 347 Fettrow, T., Reimann, H., Grenet, D., Thompson, E., Crenshaw, J., Higginson, J., Jeka, J.,  
348 2019. Interdependence of balance mechanisms during bipedal locomotion. *bioRxiv*, 658120.
- 349 Florence, C.S., Bergen, G., Atherly, A., Burns, E., Stevens, J., Drake, C., 2018. Medical costs  
350 of fatal and nonfatal falls in older adults. *Journal of the American Geriatrics Society* 66, 693-  
351 698.
- 352 Hak, L., Houdijk, H., Beek, P.J., van Dieen, J.H., 2013. Steps to take to enhance gait stability:  
353 the effect of stride frequency, stride length, and walking speed on local dynamic stability and  
354 margins of stability. *PLoS One* 8, e82842.
- 355 Heitkamp, L.N., Stimpson, K.H., Dean, J.C., 2019. Application of a novel force-field to  
356 manipulate the relationship between pelvis motion and step width in human walking. *IEEE*  
357 *Transactions on Neural Systems and Rehabilitation Engineering* 27, 2051-2058.
- 358 Hof, A.L., 2007. The equations of motion for a standing human reveal three mechanisms for  
359 balance. *Journal of biomechanics* 40, 451-457.
- 360 Hurt, C.P., Rosenblatt, N., Crenshaw, J.R., Grabiner, M.D., 2010. Variation in trunk  
361 kinematics influences variation in step width during treadmill walking by older and younger  
362 adults. *Gait & posture* 31, 461-464.
- 363 Mahaki, M., Bruijn, S.M., Van Dieën, J.H., 2019. The effect of external lateral stabilization  
364 on the use of foot placement to control mediolateral stability in walking and running. *PeerJ* 7,  
365 e7939.
- 366 Mehdizadeh, S., 2019. A robust method to estimate the largest lyapunov exponent of noisy  
367 signals: a revision to the rosenstein's algorithm. *Journal of biomechanics* 85, 84-91.
- 368 Meyer, C., Killeen, T., Easthope, C.S., Curt, A., Bolliger, M., Linnebank, M., Zörner, B.,  
369 Filli, L., 2019. Familiarization with treadmill walking: How much is enough? *Scientific*  
370 *reports* 9, 1-10.

371 Perry, J.A., Srinivasan, M., 2017. Walking with wider steps changes foot placement control,  
372 increases kinematic variability and does not improve linear stability. *Royal Society open*  
373 *science* 4, 160627.

374 Polinder, S., Haagsma, J., Panneman, M., Scholten, A., Brugmans, M., Van Beeck, E., 2016.  
375 The economic burden of injury: Health care and productivity costs of injuries in the  
376 Netherlands. *Accident analysis & prevention* 93, 92-100.

377 Rebula, J.R., Ojeda, L.V., Adamczyk, P.G., Kuo, A.D., 2017. The stabilizing properties of  
378 foot yaw in human walking. *Journal of biomechanics* 53, 1-8.

379 Reimann, H., Fettrow, T., Jeka, J.J., 2018. Strategies for the Control of Balance During  
380 Locomotion. *Kinesiology Review* 7, 18-25.

381 Reimold, N.K., Knapp, H.A., Henderson, R.E., Wilson, L., Chesnutt, A.N., Dean, J.C., 2019.  
382 Altered active control of step width in response to mediolateral leg perturbations while  
383 walking. *bioRxiv*.

384 Roerdink, M., Lamoth, C.J., Beek, P.J., 2008. Online gait event detection using a large force  
385 platform embedded in a treadmill. *Journal of biomechanics* 41, 2628-2632.

386 Rosenstein, M.T., Collins, J.J., De Luca, C.J., 1993. A practical method for calculating largest  
387 Lyapunov exponents from small data sets. *Physica D: Nonlinear Phenomena* 65, 117-134.

388 Rubenstein, L.Z., 2006. Falls in older people: epidemiology, risk factors and strategies for  
389 prevention. *Age and ageing* 35, ii37-ii41.

390 Rubenstein, L.Z., Josephson, K.R., 2006. Falls and their prevention in elderly people: what  
391 does the evidence show? *Medical Clinics* 90, 807-824.

392 van Leeuwen, A.M., van Dieen, J.H., Daffertshofer, A., Bruijn, S.M., 2020. Active foot  
393 placement control ensures stable gait: Effect of constraints on foot placement and ankle  
394 moments. *Plos one* 15, e0242215.

395 Vandervoort, A.A., 2002. Aging of the human neuromuscular system. *Muscle & Nerve:*  
396 *Official Journal of the American Association of Electrodiagnostic Medicine* 25, 17-25.

397 Wang, Y., Srinivasan, M., 2014. Stepping in the direction of the fall: the next foot placement  
398 can be predicted from current upper body state in steady-state walking. *Biology letters* 10.

399 Wu, M., Matsubara, J.H., Gordon, K.E., 2015. General and specific strategies used to  
400 facilitate locomotor maneuvers. *PloS one* 10.

401 Zatsiorsky, V., 1990. Methods of determining mass-inertial characteristics of human body  
402 segments. *Contemporary Problems of Biomechanics*.

403 Zhang, Y., Smeets, J.B., Brenner, E., Verschueren, S., Duysens, J., 2020. Fast responses to  
404 stepping-target displacements when walking. *The Journal of Physiology*.

405
